# Supplementary material
Source: publisher figshare collection journal article supplement (https://gsajournals.figshare.com/ndownloader/files/26580974)
Supplement: Supplementary file 1 [file 26580974]

ONT RAPID

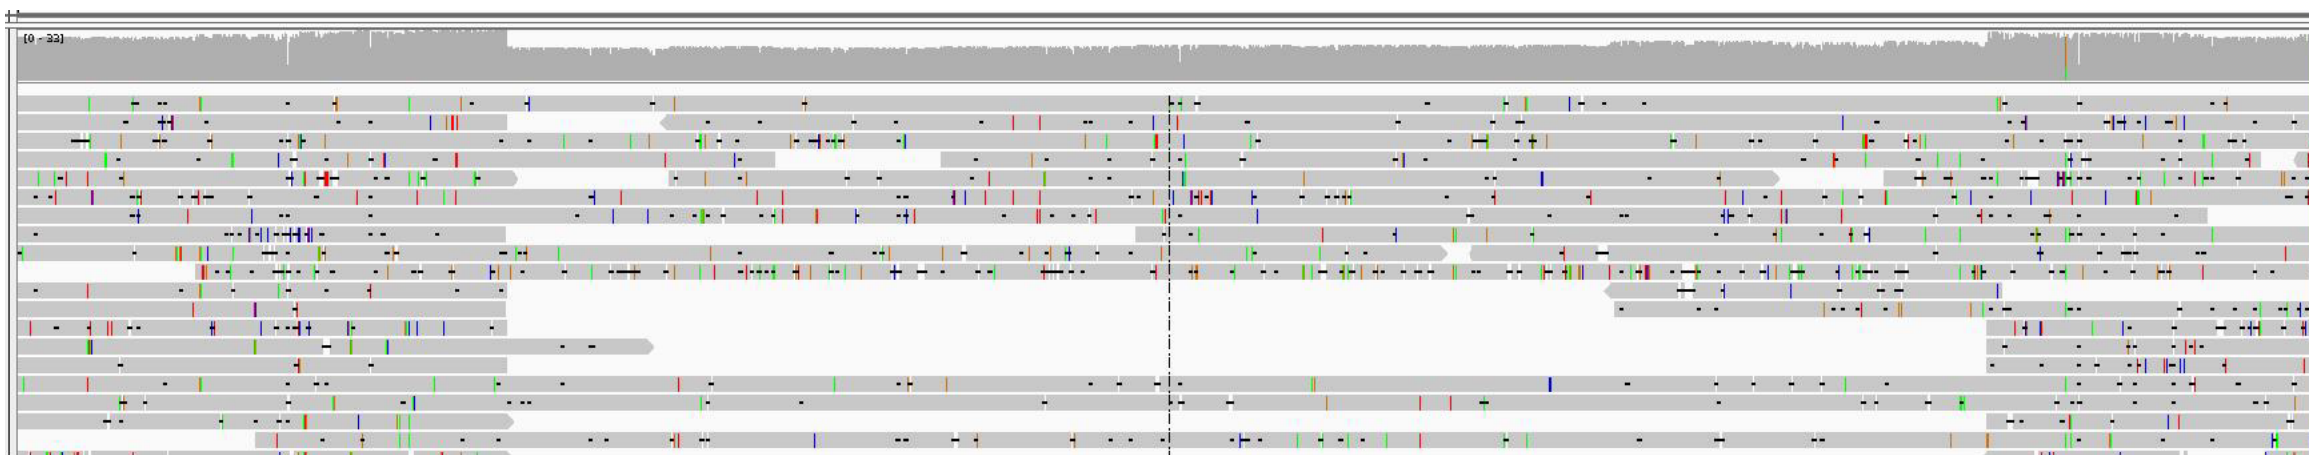

PB CLR

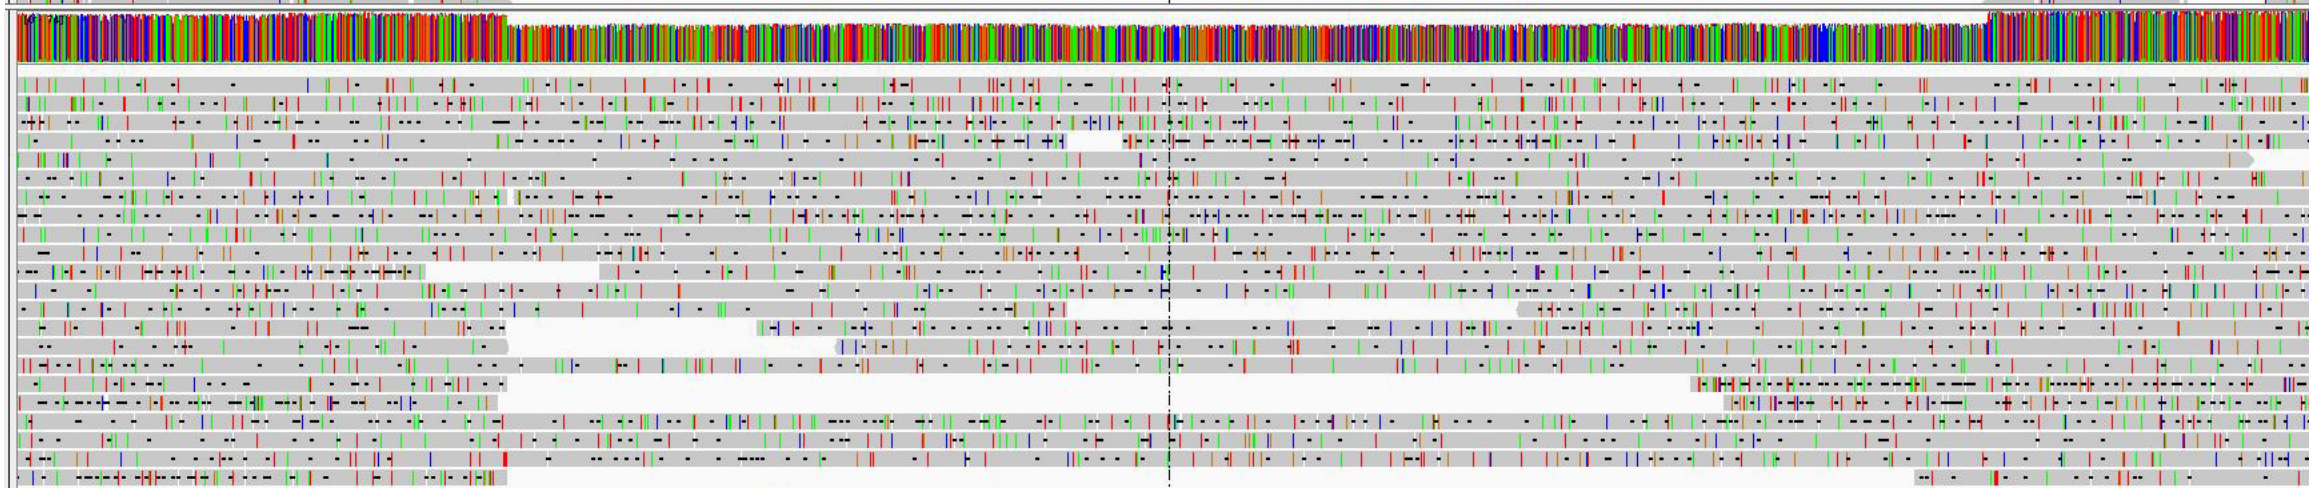

Ecoli.UMIGS

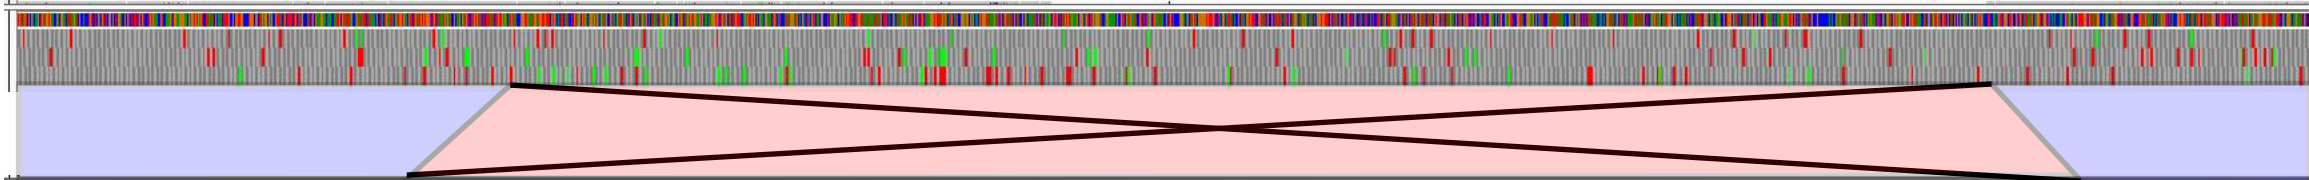

ONT RAPID

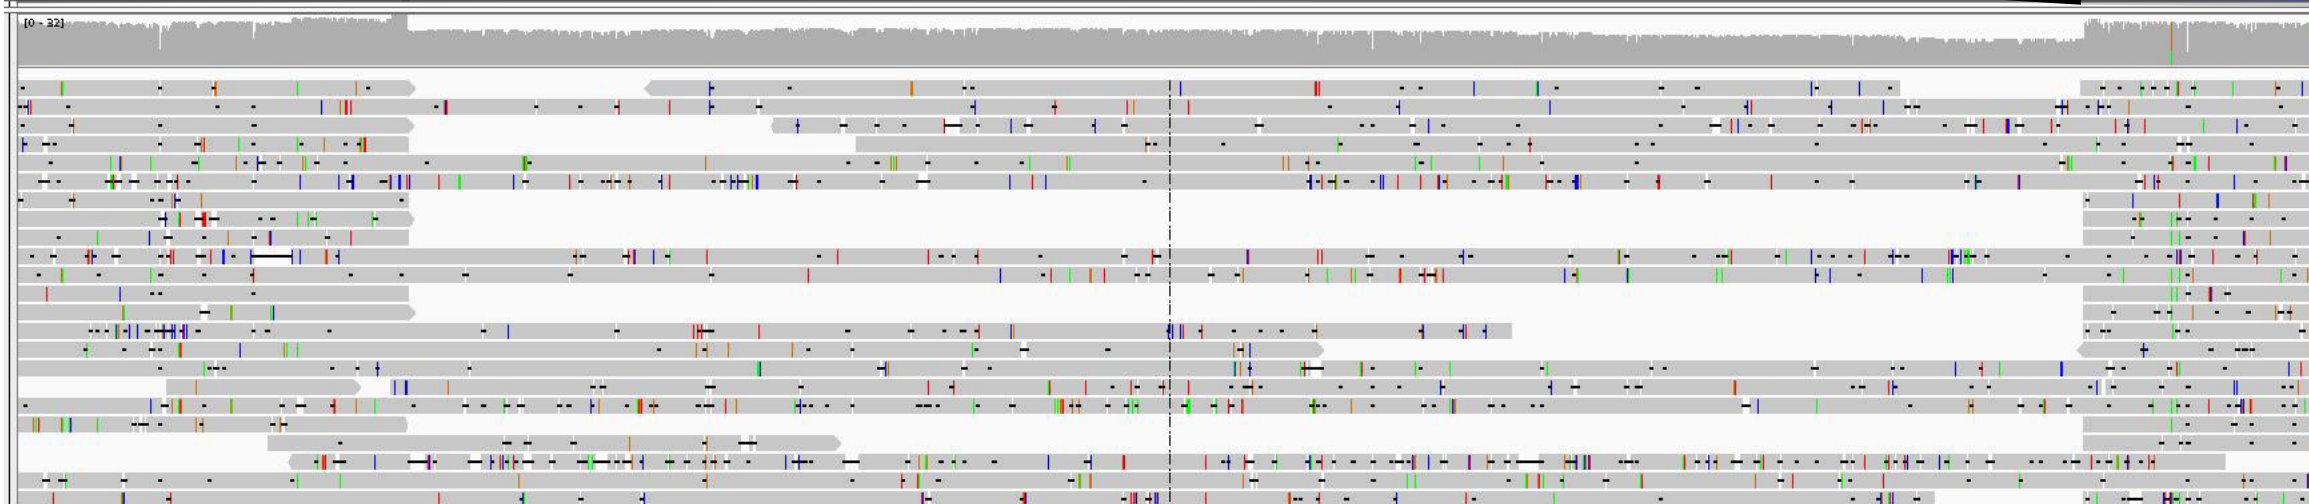

PB CLR

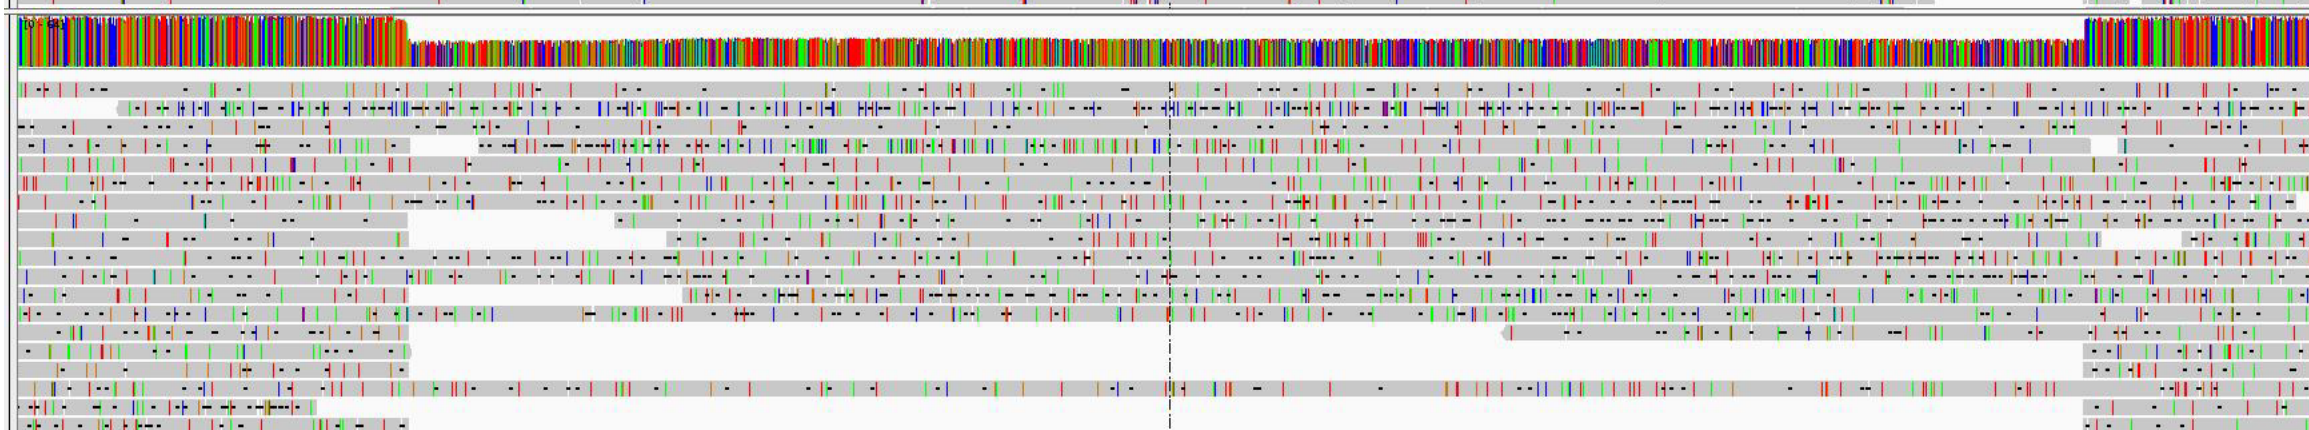

Flye CLR

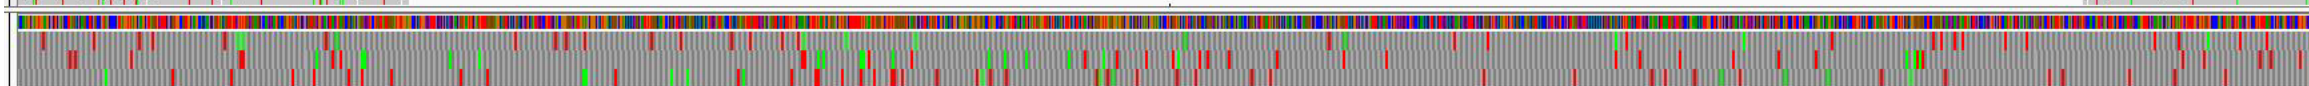

**Figure S1. Evidence of long read mapping to *E. coli* inversion region**

ONT RAPID and PacBio Sequel II CLR reads were mapped to two assemblies containing an inversion region in the *E. coli* genome. Mapped reads were visualized in IGV. The region highlighted in red corresponds to the ~2 kbp region with an inverted orientation in the Flye PacBio CLR assembly relative to Ecoli.UMIGS. Regions highlighted in blue are syntenic. There were individual ONT and PacBio reads spanning the entire inversion regions in both orientations.
